# Supplementary material for: Incorporating Milk Protein Isolate into an Energy-Restricted Western-Style Eating Pattern Augments Improvements in Blood Pressure and Triglycerides, but Not Body Composition Changes in Adults Classified as Overweight or Obese: A Randomized Controlled Trial
Source: MDPI journal article supplement (doi:10.3390/nu12030851), 2020-03-22
Supplement: s1 [file s1]

**Supplemental Table 1.** Example menu for a ~2350 kcal Western-style eating pattern consumed during the 3-week baseline period

|                                                            | Quantity | Unit              |
|------------------------------------------------------------|----------|-------------------|
| <b>Day 1</b>                                               |          |                   |
| <b>Breakfast</b>                                           |          |                   |
| Kroger Southern Style Biscuit                              | 2        | each              |
| Butter*                                                    | 5        | gram              |
| Jimmy Dean Fully Cooked Sausage Patties                    | 43       | gram              |
| Pineapple, canned in heavy syrup                           | 1/2      | cup               |
| Welch's Essentials Juice Cocktail                          | 10       | fl oz             |
| <b>Lunch</b>                                               |          |                   |
| Michelina's Authentic Cheese Manicotti with Marinara Sauce | 1        | meal (213 gram)   |
| <u>Garden Salad</u>                                        |          |                   |
| Iceburg Lettuce, shredded                                  | 3/4      | cup               |
|                                                            |          | slices (1/4 inch  |
| Cucumber, sliced with peel                                 | 2        | each)             |
| Red Cherry Tomato                                          | 2        | each              |
| Baby Carrots                                               | 2        | each              |
| Shredded Cheddar Cheese, 2% Milkfat                        | 8        | gram              |
| Ranch Dressing                                             | 1        | Tbsp              |
| Croutons                                                   | 7        | gram              |
| Strawberries, halves                                       | 1 1/2    | cup               |
| Minute Maid Lemonade                                       | 10       | fl oz             |
| <b>Mid-Afternoon Snack</b>                                 |          |                   |
| Zone Perfect Bar*                                          | 1        | serving (37 gram) |
| <b>Dinner</b>                                              |          |                   |
| Pork Loin, raw weight                                      | 95       | gram              |
| Sweet Potato, without peel                                 | 1        | medium            |
| Mini Marshmallows*                                         | 10       | each              |
| Frozen Broccoli                                            | 1        | cup               |
| Kraft American Cheese Singles                              | 9.5      | gram              |
| King's Hawaiian Honey Wheat Roll                           | 1        | each              |
| Butter*                                                    | 5        | gram              |
| Jello Gelatin Dessert (any flavor)                         | 1        | each              |
| Regular Cool Whip                                          | 1/4      | cup               |
| Sprite                                                     | 1        | can (12 fl oz)    |
| <b>Day 2</b>                                               |          |                   |
| <b>Breakfast</b>                                           |          |                   |
| Grands Mini Buttermilk Biscuits*                           | 2        | each              |
| Butter*                                                    | 10       | gram              |
|                                                            |          | container (170    |
| Kroger Blended Yogurt (any flavor)                         | 1        | gram)             |
| Grape Nuts Cereal                                          | 1/4      | cup               |
| Welch's Essentials Juice Cocktail                          | 10       | fl oz             |
| <b>Lunch</b>                                               |          |                   |
| Campbell's Chunky Chicken Broccoli Cheese & Potato Soup    | 320      | gram              |
| Healthy Life 100% Whole Wheat Bread                        | 1        | slice             |
| Corn                                                       | 1/2      | cup               |
| Butter*                                                    | 15       | gram              |
| Apple Pear Fruit Crisp                                     | 1        | each              |
| Soda                                                       | 1        | can (12 fl oz)    |
| <b>Mid-Afternoon Snack</b>                                 |          |                   |
| <u>Granola*</u>                                            |          |                   |
| Kroger 100% Whole Grain Oats                               | 19       | gram              |
| Slivered almonds                                           | 6        | gram              |
| Vital wheat gluten                                         | 8        | gram              |
| Log Cabin NSA pancake syrup                                | 4        | gram              |
| Splenda                                                    | 1        | gram              |

|                                                      |       |                   |
|------------------------------------------------------|-------|-------------------|
| Dried banana                                         | 5     | gram              |
| <b>Dinner</b>                                        |       |                   |
| Frozen Chicken Breast, fully cooked                  | 90    | gram              |
| White Rice, cooked                                   | 1/2   | cup               |
| Carrots, frozen, sliced                              | 1/2   | cup               |
| Butter*                                              | 15    | gram              |
| <u>Garden Salad</u>                                  |       |                   |
| Iceburg Lettuce, shredded                            | 3/4   | cup               |
| Cucumber, sliced with peel                           | 2     | slices, 1/4" each |
| Red Cherry Tomatoes                                  | 2     | each              |
| Baby Carrots                                         | 2     | each              |
| Shredded Cheddar Cheese, 2% Milkfat                  | 20    | gram              |
| Ranch Dressing                                       | 1 1/2 | Tbsp              |
| Jello-O Sugar Free Pudding                           | 1     | each              |
| Lemonade                                             | 16    | fl oz             |
| <b>Day 3</b>                                         |       |                   |
| <b>Breakfast</b>                                     |       |                   |
| Kroger Homestyle Frozen Waffles                      | 2     | each              |
| Butter*                                              | 20    | gram              |
| Original Aunt Jemima Syrup                           | 3     | Tbsp              |
| Land O Frost Canadian Bacon Natural Hickory Smoked   | 43    | gram              |
| Mixed Fruit, no added sugar                          | 1     | each (1/2 cup)    |
| Welch's Essentials Juice Cocktail                    | 8     | fl oz             |
| <b>Lunch</b>                                         |       |                   |
| Stouffer's Macaroni & Cheese (frozen)                | 148   | gram              |
| Campbell's Kettle Soups, Tomato & Sweet Basil Bisque | 180   | gram              |
| Apple Cinnamon Fruit Crisp                           | 1     | each              |
| Soda                                                 | 1     | can (12 fl oz)    |
| <b>Mid-Afternoon Snack</b>                           |       |                   |
| Skim Milk                                            | 12    | fl oz             |
| Oreo Cookies                                         | 2     | each              |
| <b>Dinner</b>                                        |       |                   |
| Beef Tenderloin, broiled*                            | 80    | gram              |
| Heinz Home Style Savory Beef Gravy                   | 1/4   | cup               |
| Ore Ida Steam & Mash Cut Potatoes                    | 3/4   | cup               |
| Cut Green Beans, No Salt Added                       | 1/2   | cup               |
| King's Hawaiian Whole Wheat Roll                     | 1     | each              |
| Vividly Vanilla Ice Cream, no added sugar            | 1/3   | cup               |
| Butter*                                              | 5     | gram              |
| Jellybeans*                                          | 15    | each              |
| <b>Day 4</b>                                         |       |                   |
| <b>Breakfast</b>                                     |       |                   |
| Grands Mini Buttermilk Biscuits*                     | 2     | each              |
| Butter*                                              | 10    | gram              |
| Kroger Blended Yogurt (any flavor)                   | 1     | gram)             |
| Grape Nuts                                           | 1     | Tbsp              |
| Apple Pear Fruit Crisp                               | 1     | each              |
| Welch's Essentials Juice Cocktail                    | 10    | fl oz             |
| <b>Lunch</b>                                         |       |                   |
| Campbell's Chunky Chicken Corn Chowder               | ~1    | cup (266 gram)    |
| Healthy Life 100% Whole Wheat Bread                  | 1     | slice             |
| Shredded Cheese, 2% Milkfat                          | 16    | gram              |
| Pimento*                                             | 6     | gram              |
| Heinz Real Mayonnaise*                               | 2     | Tbsp              |
| Carrots, sliced frozen                               | 1/2   | cup               |
| Butter*                                              | 15    | gram              |
| Teddy Grahams*                                       | 5     | each              |

|                                                            |       |                   |
|------------------------------------------------------------|-------|-------------------|
| Vanilla Frosting*                                          | 10    | gram              |
| Jellybeans*                                                | 8     | each              |
| Pepsi                                                      | 1     | can (12 fl oz)    |
| <b>Mid-Afternoon Snack</b>                                 |       |                   |
| Zone Perfect Bar*                                          | 1     | serving (37 gram) |
| <b>Dinner</b>                                              |       |                   |
| Barilla Plus Rotini Pasta, dry weight                      | 20    | gram              |
| Prego Meatless Spaghetti Sauce                             | 1/2   | cup               |
| Ground Beef, 90% lean, raw weight                          | 85    | gram              |
| Parmesan Cheese                                            | 3     | Tbsp              |
| Coles Sliced Garlic Bread                                  | 1/2   | slice             |
| Lettuce, shredded                                          | 3/4   | cup               |
| Croutons*                                                  | 7     | gram              |
| Ken's Steakhouse Light Creamy Caesar Dressing              | 1     | Tbsp              |
| Jello Gelatin Dessert                                      | 1     | each              |
| Cool Whip Topping                                          | 3 1/2 | Tbsp              |
| Lemonade                                                   | 6     | fl oz             |
| <b>Day5</b>                                                |       |                   |
| <b>Breakfast</b>                                           |       |                   |
| Kroger Southern Style Biscuit                              | 2     | each              |
| Butter*                                                    | 10    | gram              |
| Jimmy Dean Fully Cooked Sausage Patties                    | 1     | patty (43 gram)   |
| Welch's Essentials Juice Cocktail                          | 8     | fl oz             |
| <b>Lunch</b>                                               |       |                   |
| Michelina's Authentic Cheese Manicotti with Marinara Sauce | 1     | meal (213 gram)   |
| <u>Garden Salad</u>                                        |       |                   |
| Iceburg Lettuce, shredded                                  | 3/4   | cup               |
|                                                            |       | slices (1/4 inch  |
| Cucumber, sliced with peel                                 | 2     | each)             |
| Red Cherry Tomato                                          | 2     | each              |
| Baby Carrots                                               | 2     | each              |
| Shredded Cheddar Cheese, 2% Milkfat                        | 9     | gram              |
| Croutons*                                                  | 7     | gram              |
| Ranch Dressing                                             | 1     | Tbsp              |
| Watermelon, cubed                                          | 1/2   | cup               |
| Jell-O Sugarfree Pudding                                   | 1     | each              |
| Jellybeans*                                                | 10    | each              |
| Soda                                                       | 1     | can (12 fl oz)    |
| <b>Mid-Afternoon Snack</b>                                 |       |                   |
| <u>Granola*</u>                                            |       |                   |
| Kroger 100% Whole Grain Oats                               | 19    | gram              |
| Slivered almonds                                           | 6     | gram              |
| Vital wheat gluten                                         | 8     | gram              |
| Log Cabin NSA pancake syrup                                | 4     | gram              |
| Splenda                                                    | 1     | gram              |
| Dried banana                                               | 5     | gram              |
| <b>Dinner</b>                                              |       |                   |
| Kentucky Legend Hickory Smoked Hamsteak                    | 112   | gram              |
| Kroger Roasted Redskin Potatoes, frozen                    | 1/2   | cup               |
| King's Hawaiian Whole Wheat Roll                           | 1     | each              |
| Butter*                                                    | 10    | gram              |
| Peas, frozen                                               | 1     | cup               |
| Lemonade                                                   | 8     | fl oz             |
| Jellybeans*                                                | 8     | each              |
| <b>Day 6</b>                                               |       |                   |
| <b>Breakfast</b>                                           |       |                   |
| Kroger Homestyle Frozen Waffles                            | 10    | gram              |
| Butter*                                                    | 10    | gram              |

|                                                      |        |                |
|------------------------------------------------------|--------|----------------|
| Original Aunt Jemima Syrup                           | 2 1/2  | Tbsp           |
| Land O Frost Canadian Bacon Natural Hickory Smoked   | 43     | gram           |
| Mixed Fruit, no added sugar                          | 1      | each           |
| Welch's Essentials Juice Cocktail                    | 8      | fl oz          |
| <b>Lunch</b>                                         |        |                |
| Stouffers Macaroni & Cheese (frozen)                 | 1/2    | cup (118 gram) |
| Campbell's Kettle Soups, Tomato & Sweet Basil Bisque | ~1 1/2 | cup (330 gram) |
| Pineapple, canned in heavy syrup                     | 1/2    | cup            |
| Pepsi                                                | 1      | can (12 fl oz) |
| <b>Mid-Afternoon Snack</b>                           |        |                |
| Skim Milk                                            | 10     | fl oz          |
| Oreo Cookies                                         | 3      | each           |
| <b>Dinner</b>                                        |        |                |
| <u>Beef Burrito</u>                                  |        |                |
| Ole Extreme Wellness Whole Wheat Tortilla            | 1      | each           |
| Tyson Grilled & Ready Seasoned Steak Strips          | 88     | gram           |
| Lettuce, shredded                                    | 1/2    | cup            |
| Shredded Cheddar cheese, 2% Milkfat                  | 12     | gram           |
| Heinz Real Mayonnaise*                               | 1      | Tbsp           |
| Southwestern Ranch Dressing*                         | 16     | gram           |
| Tostitos Scoops                                      | 10     | each           |
| Salsa                                                | 2      | Tbsp           |
| Orange, fresh                                        | 1      | each           |
| Sprite                                               | 1      | can (12 fl oz) |
| <b>Day 7</b>                                         |        |                |
| <b>Breakfast</b>                                     |        |                |
| Grands Mini Buttermilk Biscuits*                     | 1      | each           |
| Butter*                                              | 5      | gram           |
|                                                      |        | container (170 |
| Kroger Blended Yogurt (any flavor)                   | 1      | gram)          |
| Grape Nuts                                           | 1/4    | cup            |
| Apple Pear Fruit Crisp                               | 1      | container      |
| Welch's Essentials Juice Cocktail                    | 12     | fl oz          |
| <b>Lunch</b>                                         |        |                |
| Campbell's Chunky Chicken Corn Chowder               | 360    | gram           |
| Kraft American Cheese                                | 19     | gram           |
| Cut Green Beans, No Added Salt                       | 1      | cup            |
| Butter*                                              | 15     | gram           |
| Watermelon, raw                                      | 1/2    | cup            |
| Lemonade                                             | 12     | fl oz          |
| <b>Mid-Afternoon Snack</b>                           |        |                |
| Soy Nuts*                                            | 28     | gram           |
| Diet Soda                                            | 1      | can (12 fl oz) |
| <b>Dinner</b>                                        |        |                |
| Frozen Grilled Chicken Breast, fully cooked          | 80     | gram           |
| Potato, small baked                                  | 1      | each           |
| Oscar Mayer Turkey Bacon                             | 1      | slice          |
| Sour Cream                                           | 1      | Tbsp           |
| Shredded Cheddar Cheese, 2% Milkfat                  | 9      | gram           |
| Coles Sliced Garlic Bread                            | 1/2    | slice          |
| Carrots, slice, frozen                               | 1/2    | cup            |
| Butter*                                              | 15     | gram           |
| Vividly Vanilla Ice Cream, No Added Sugar            | 1/3    | cup            |
| Hot Fudge or Hot Caramel                             | 1/2    | Tbsp           |
| Jellybeans*                                          | 8      | each           |
| Lemonade                                             | 8      | fl oz          |

---

\*Indicates foods were provided to participant

**Supplemental Table 2.** Example menu for a 1600 kcal Western-style eating pattern consumed during the 16-week intervention period

|                                           | Quantity | Unit               |
|-------------------------------------------|----------|--------------------|
| <b>Day 1</b>                              |          |                    |
| <b>Breakfast</b>                          |          |                    |
| Biscuit <sup>#</sup>                      | 2        | each               |
| Gravy <sup>#</sup>                        | 178      | gram               |
| Jimmy Dean Fully Cooked Sausage Links     | 21       | gram               |
| Skim milk                                 | 6        | fl oz              |
| <b>Lunch</b>                              |          |                    |
| <u>Pepperoni Pizza</u>                    |          |                    |
| Pizza Crust <sup>#</sup>                  | 1        | each               |
| Rago Pizza Sauce                          | 1/2      | cup                |
| Pepperoni                                 | 14       | gram               |
| Mozzarella Cheese                         | 22       | gram               |
| <u>Garden Salad</u>                       |          |                    |
| Shredded lettuce, iceberg                 | 3/4      | cup                |
| Cucumber, sliced with peel                | 2        | slices, 1/4" each  |
| Red Cherry Tomatoes                       | 2        | each               |
| Baby Carrots                              | 2        | each               |
| Ranch Dressing, fat free                  | 1        | Tbsp               |
| Fruit Smoothie <sup>#</sup>               | 1        | serving (250 gram) |
| <b>Mid-Afternoon Snack</b>                |          |                    |
| Cliff Builder Bar <sup>*</sup>            | 1        | serving (36 gram)  |
| <b>Dinner</b>                             |          |                    |
| Pork Loin, raw weight                     | 103      | gram               |
| Sweet Potato, boiled with no skin         | 1        | medium             |
| Mini-Marshmallows <sup>*</sup>            | 10       | each               |
| Frozen Broccoli                           | 1        | cup                |
| Kraft American Cheese                     | 10       | gram               |
| King's Hawaiian Honey Wheat Dinner Roll   | 1        | each               |
| Butter <sup>*</sup>                       | 5        | gram               |
| <b>Day 2</b>                              |          |                    |
| <b>Breakfast</b>                          |          |                    |
| Blueberry Muffin <sup>*</sup>             | 2        | each               |
| Kroger Carbmaster Yogurt (any flavor)     | 1        | each (170 gram)    |
| Almonds, Blanched <sup>*</sup>            | 4        | gram               |
| Quaker Kretschmer Wheat Germ <sup>*</sup> | 10       | gram               |
| Vanilla Drink <sup>#</sup>                | ~12      | fl oz (297 gram)   |
| Chocolate Flavoring Syrup <sup>*</sup>    | 10       | gram               |
| <b>Lunch</b>                              |          |                    |
| Corn Chowder <sup>#</sup>                 | 1        | serving            |
| Healthy Life 100% Whole Wheat Bread       | 1        | slice              |
| Honey Ham                                 | 21       | gram               |
| American Cheese                           | 19       | gram               |
| Diet Pepsi <sup>*</sup>                   | 1        | can (12 fl oz)     |
| <b>Mid-Afternoon Snack</b>                |          |                    |
| <u>Granola<sup>*</sup></u>                |          |                    |
| Kroger 100% Whole Grain Oats              | 19       | gram               |
| Slivered almonds                          | 6        | gram               |
| Vital wheat gluten                        | 8        | gram               |
| Log Cabin NSA pancake syrup               | 4        | gram               |
| Splenda                                   | 1        | gram               |
| Dried banana                              | 5        | gram               |
| <b>Dinner</b>                             |          |                    |
| Frozen Chicken Breast, fully cooked       | 103      | gram               |
| White Rice, cooked                        | 1/2      | cup                |

|                                                    |     |                    |
|----------------------------------------------------|-----|--------------------|
| Peas, frozen                                       | 1/4 | cup                |
| Butter*                                            | 5   | gram               |
| <u>Garden Salad</u>                                |     |                    |
| Iceburg Lettuce, shredded                          | 3/4 | cup                |
| Cucumber, sliced with peel                         | 2   | slices, 1/4" each  |
| Red Cherry Tomatoes                                | 2   | each               |
| Baby Carrots                                       | 2   | each               |
| Shredded Cheddar Cheese, 2% Milkfat                | 14  | gram               |
| Ranch Dressing, fat free*                          | 1/2 | Tbsp               |
| <b>Day 3</b>                                       |     |                    |
| <b>Breakfast</b>                                   |     |                    |
| Pancakes#                                          | 4   | each               |
| Butter*                                            | 5   | gram               |
| Syrup, No Added Sugar Log Cabin                    | 2   | Tbsp               |
| Land O Frost Canadian Bacon Natural Hickory Smoked | 49  | gram               |
| <b>Lunch</b>                                       |     |                    |
| Cheesy Turkey Noodle Casserole#                    | 1   | serving            |
| Pasta, corn, cooked                                | 74  | gram               |
| <b>Mid-Afternoon Snack</b>                         |     |                    |
| Skim Milk                                          | 8   | fl oz              |
| Snackwell's Fat Free Devil's Food Cookie           | 3   | each               |
| <b>Dinner</b>                                      |     |                    |
| Beef Tenderloin, broiled*                          | 90  | gram               |
| Mushrooms, raw, sliced                             | 1/2 | cup                |
| Heinz Home Style Savory Beef Gravy                 | 2   | Tbsp               |
| Ore Ida Steam & Mash Cut Potatoes                  | 1/2 | cup                |
| Cut Green Beans, No Salt Added                     | 1/2 | cup                |
| King's Hawaiian Honey Wheat Roll                   | 1   | each               |
| Butter*                                            | 5   | gram               |
| <b>Day 4</b>                                       |     |                    |
| <b>Breakfast</b>                                   |     |                    |
| Triple Berry Muffin*                               | 2   | each               |
| Kroger Carbmater Yogurt (any flavor)               | 1   | each (170 gram)    |
| Almonds, Blanched*                                 | 7   | gram               |
| Quaker Kretschmer Wheat Germ*                      | 7   | gram               |
| Vanilla Drink#                                     | ~12 | fl oz (297 gram)   |
| Chocolate Flavoring Syrup*                         | 10  | gram               |
| <b>Lunch</b>                                       |     |                    |
| Potato Chowder#                                    | 1   | serving            |
| Healthy Life 100% Whole Wheat Bread                | 1   | slice              |
| Pimento*                                           | 6   | gram               |
| Shredded Cheddar Cheese, 2% Milkfat                | 28  | gram               |
| Fat Free Mayonnaise*                               | 1   | Tbsp               |
| Baby Carrots                                       | 6   | each               |
| Diet Pepsi                                         | 1   | can (12 fl oz)     |
| <b>Mid-Afternoon Snack</b>                         |     |                    |
| Clif Builders Bar                                  | 1   | serving (36 gram)  |
| <b>Dinner</b>                                      |     |                    |
| Barilla Plus Rotini Pasta, dry weight              | 28  | gram               |
| Prego Meatless Spaghetti Sauce                     | 1/2 | cup                |
| Honeysuckle White Breast of Turkey, raw            | 83  | gram               |
| Parmesan Cheese                                    | 3   | Tbsp               |
| <u>Caesar Salad</u>                                |     |                    |
| Lettuce, shredded                                  | 3/4 | cup                |
| Ken's Steakhouse Light Creamy Caesar Dressing      | 1   | Tbsp               |
| <b>Day5</b>                                        |     |                    |
| <b>Breakfast</b>                                   |     |                    |
| Gravy#                                             | 1   | serving (178 gram) |

|                                                    |     |                    |
|----------------------------------------------------|-----|--------------------|
| Jimmy Dean Fully Cooked Sausage Links              | 1   | link (21 gram)     |
| Pears, juice pack                                  | 1/2 | cup                |
| Skim Milk                                          | 8   | fl oz              |
| <b>Lunch</b>                                       |     |                    |
| <u>Pepperoni Pizza</u>                             |     |                    |
| Pizza Crust <sup>#</sup>                           | 1   | each               |
| Rago Pizza Sauce                                   | 1/2 | cup                |
| Pepperoni                                          | 14  | gram               |
| Mozzarella Cheese                                  | 20  | gram               |
| <u>Garden Salad</u>                                |     |                    |
| Shredded lettuce, iceberg                          | 3/4 | cup                |
| Cucumber, sliced with peel                         | 2   | slices, 1/4" each  |
| Red Cherry Tomatoes                                | 2   | each               |
| Baby Carrots                                       | 2   | each               |
| Ranch Dressing, fat free*                          | 1   | Tbsp               |
| Fruit Smoothie <sup>#</sup>                        | 1   | serving (250 gram) |
| Peaches, canned, water packed                      | 1   | cup                |
| <b>Mid-Afternoon Snack</b>                         |     |                    |
| <u>Granola*</u>                                    |     |                    |
| Kroger 100% Whole Grain Oats                       | 19  | gram               |
| Slivered almonds                                   | 6   | gram               |
| Vital wheat gluten                                 | 8   | gram               |
| Log Cabin NSA pancake syrup                        | 4   | gram               |
| Splenda                                            | 1   | gram               |
| Dried banana                                       | 5   | gram               |
| <b>Dinner</b>                                      |     |                    |
| Kentucky Legend Ham                                | 149 | gram               |
| Kroger Roasted Redskin Potatoes, frozen            | 1/2 | cup                |
| Olive Oil                                          | 2   | tsp                |
| Parmesan Cheese                                    | 2   | Tbsp               |
| Peas, frozen                                       | 1/2 | cup                |
| <b>Day 6</b>                                       |     |                    |
| <b>Breakfast</b>                                   |     |                    |
| Pancakes <sup>#</sup>                              | 4   | each               |
| Butter*                                            | 5   | gram               |
| Syrup, No Added Sugar Log Cabin                    | 2   | Tbsp               |
| Land O Frost Canadian Bacon Natural Hickory Smoked | 49  | gram               |
| <b>Lunch</b>                                       |     |                    |
| Cheesy Tuna Casserole <sup>#</sup>                 | 1   | serving            |
| Pasta, corn, cooked                                | 74  | gram               |
| <b>Mid-Afternoon Snack</b>                         |     |                    |
| Skim Milk                                          | 8   | fl oz              |
| Snackwell's Fat Free Devil's Food Cookie           | 3   | each               |
| <b>Dinner</b>                                      |     |                    |
| <u>Beef Burrito</u>                                |     |                    |
| Ole Extreme Wellness Whole Wheat Tortilla          | 1   | each               |
| Tyson Grilled & Ready Beef Fajita                  | 88  | gram               |
| Lettuce, shredded                                  | 1/2 | cup                |
| Shredded Cheddar cheese, 2% Milkfat                | 22  | gram               |
| Southwestern Ranch Dressing*                       | 1   | Tbsp (16 gram)     |
| Tostitos Scoops, Baked                             | 10  | each               |
| Salsa                                              | 1/4 | cup                |
| <b>Day 7</b>                                       |     |                    |
| <b>Breakfast</b>                                   |     |                    |
| Blueberry Muffin*                                  | 2   | each               |
| Kroger Carbmaster Yogurt (any flavor)              | 1   | each (170 gram)    |
| Almonds, Blanched*                                 | 6   | gram               |
| Quaker Kretschmer Wheat Germ*                      | 9   | gram               |

|                                                    |     |                  |
|----------------------------------------------------|-----|------------------|
| Vanilla Drink#                                     | ~12 | fl oz (297 gram) |
| Chocolate Flavoring Syrup*                         | 10  | gram             |
| <b>Lunch</b>                                       |     |                  |
| Ham & Cheese Hashbrown Casserole#                  | 1   | serving          |
| Cut Green Beans, No Added Salt                     | 1   | cup              |
| Butter*                                            | 5   | gram             |
| <b>Mid-Afternoon Snack</b>                         |     |                  |
| Soy Nuts*                                          | 28  | gram             |
| Diet Soda                                          | 1   | can (12 fl oz)   |
| <b>Dinner</b>                                      |     |                  |
| Kroger Frozen Grilled Chicken Breast, fully cooked | 95  | gram             |
| Potato, small baked                                | 1   | each             |
| Oscar Mayer Turkey Bacon                           | 1   | slice            |
| Sour Cream, fat free                               | 1   | Tbsp             |
| Shredded Cheddar Cheese, 2% Milkfat                | 14  | gram             |
| Carrots, slice, frozen                             | 1/2 | cup              |
| Butter*                                            | 10  | gram             |

---

\* Indicates foods were provided to participant

# Indicates that foods that were provided contained either the maltodextrin or milk protein isolate



**Supplementary Table 3.** The ingredient list and gram weights for the select foods and beverages that contained milk protein isolate or maltodextrin during the intervention for a 1600 kcal menu.

| <b>Foods</b>                                         | <b>Weight (g)</b> |
|------------------------------------------------------|-------------------|
| <b>Gravy<sup>1</sup></b>                             |                   |
| <b>MPI</b>                                           |                   |
| Milk protein isolate                                 | 20                |
| Peppered Gravy Mix                                   | 21                |
| Pepper                                               | 0.2               |
| Water                                                | 136               |
| Total                                                | 178               |
| <b>CON</b>                                           |                   |
| Polycose                                             | 16                |
| Peppered Gravy Mix                                   | 21                |
| Pepper                                               | 0.1               |
| Molly McButter                                       | 3                 |
| Water                                                | 137               |
| Total                                                | 179               |
| <b>Biscuit<sup>2</sup></b>                           |                   |
| <b>MPI</b>                                           |                   |
| Milk protein isolate                                 | 17                |
| Bisquick, Heart Smart                                | 33                |
| Water                                                | 50                |
| Total                                                | 100               |
| <b>CON</b>                                           |                   |
| Thick It                                             | 9                 |
| Polycose                                             | 6                 |
| Heart Smart Bisquick                                 | 34                |
| Molly McButter                                       | 2                 |
| Water                                                | 49                |
| Total                                                | 100               |
| <b>Vanilla drink<sup>1</sup></b>                     |                   |
| <b>MPI</b>                                           |                   |
| Milk protein isolate                                 | 22                |
| Coffeemate French Vanilla FAT FREE                   | 24                |
| Splenda                                              | 1.5               |
| Vanilla Powder                                       | 1                 |
| Water                                                | 249               |
| Total                                                | 297               |
| <b>CON</b>                                           |                   |
| Thick-it                                             | 9                 |
| Coffeemate French Vanilla FAT FREE                   | 36                |
| Water                                                | 250               |
| Total                                                | 296               |
| <b>Blueberry and triple berry muffin<sup>2</sup></b> |                   |
| <b>MPI</b>                                           |                   |
| Milk protein isolate                                 | 15                |
| Triple Berry Muffin Mix (Betty Crocker)              | 46                |
| Water                                                | 42                |
| Total                                                | 103               |
| <b>CON</b>                                           |                   |
| Thick It                                             | 7                 |
| Polycose                                             | 7                 |
| Triple Berry Muffin Mix (Betty Crocker)              | 46                |
| Water                                                | 43                |
| Total                                                | 103               |
| <b>Pancake<sup>1</sup></b>                           |                   |
| <b>MPI</b>                                           |                   |
| Milk protein isolate                                 | 37                |

|                                            |     |
|--------------------------------------------|-----|
| Bisquick Heart Smart                       | 47  |
| Egg yolk                                   | 7.5 |
| Water                                      | 156 |
| Total                                      | 248 |
| <b>CON</b>                                 |     |
| Bisquick Heart Smart                       | 104 |
| Egg yolk                                   | 7.5 |
| Water                                      | 136 |
| Total                                      | 247 |
| <b>Corn chowder<sup>1</sup></b>            |     |
| <b>MPI</b>                                 |     |
| Milk protein isolate                       | 37  |
| Minor's Low-Sodium Vegetable Base          | 10  |
| Minor's White Wine Cream Sauce Concentrate | 39  |
| Pictsweet Seasoning Blend                  | 59  |
| Spices, pepper, black                      | 0.5 |
| Corn                                       | 34  |
| Water                                      | 220 |
| Total                                      | 400 |
| <b>CON</b>                                 |     |
| Thick It                                   | 11  |
| Polycose                                   | 2   |
| Minor's Low-Sodium Vegetable Base          | 10  |
| Minor's White Wine Cream Sauce Concentrate | 39  |
| Pictsweet Seasoning Blend                  | 59  |
| Spices, pepper, black                      | 0.5 |
| Corn                                       | 34  |
| Water                                      | 221 |
| Total                                      | 400 |
| <b>Potato Chowder<sup>1</sup></b>          |     |
| <b>MPI</b>                                 |     |
| Milk protein isolate                       | 37  |
| Minor's Low-Sodium Vegetable Base          | 10  |
| Minor's White Wine Cream Sauce Concentrate | 39  |
| Pictsweet Seasoning Blend                  | 59  |
| Spices, pepper, black                      | 0.5 |
| O'Brian potatoes                           | 85  |
| Water                                      | 220 |
| Total                                      | 451 |
| <b>CON</b>                                 |     |
| Thick It                                   | 11  |
| Polycose                                   | 2   |
| Minor's Low-Sodium Vegetable Base          | 10  |
| Minor's White Wine Cream Sauce Concentrate | 39  |
| Pictsweet Seasoning Blend                  | 59  |
| Spices, pepper, black                      | 0.5 |
| O'Brian potatoes                           | 85  |
| Water                                      | 221 |
| Total                                      | 450 |
| <b>Cheesy turkey casserole<sup>1</sup></b> |     |
| <b>MPI</b>                                 |     |
| Milk protein isolate                       | 37  |
| Minor's Low-Sodium Vegetable Base          | 10  |
| Minor's White Wine Cream Sauce Concentrate | 39  |
| Pictsweet Seasoning Blend                  | 59  |
| Spices, pepper, black                      | 0.5 |
| Pasta, corn, cooked                        | 73  |
| Turkey luncheon meat                       | 25  |

|                                            |      |
|--------------------------------------------|------|
| Cheddar cheese                             | 18   |
| Peas                                       | 17   |
| Water                                      | 220. |
| Total                                      | 426  |
| <b>CON</b>                                 |      |
| Thick It                                   | 10   |
| Polycose                                   | 26   |
| Minor's White Wine Cream Sauce Concentrate | 39   |
| Minor's Low-Sodium Vegetable Base          | 10   |
| Pictsweet Seasoning Blend                  | 59   |
| Spices, pepper, black                      | 0.5  |
| Turkey luncheon meat                       | 19   |
| Cheddar cheese                             | 23   |
| Peas                                       | 17   |
| Water, tap                                 | 221  |
| Total                                      | 417  |
| <b>Cheesy tuna casserole<sup>1</sup></b>   |      |
| <b>MPI</b>                                 |      |
| Milk protein isolate                       | 37   |
| Minor's Low-Sodium Vegetable Base          | 10   |
| Minor's White Wine Cream Sauce Concentrate | 39   |
| Pictsweet Seasoning Blend                  | 59   |
| Spices, pepper, black                      | 0.5  |
| Canned tuna                                | 18   |
| Cheddar cheese                             | 16   |
| Peas                                       | 17   |
| Water                                      | 220. |
| Total                                      | 425  |
| <b>CON</b>                                 |      |
| Thick It                                   | 10   |
| Polycose                                   | 26   |
| Minor's White Wine Cream Sauce Concentrate | 39   |
| Minor's Low-Sodium Vegetable Base          | 10   |
| Pictsweet Seasoning Blend                  | 59   |
| Spices, pepper, black                      | 0.5  |
| Canned tuna                                | 17   |
| Cheddar cheese                             | 19   |
| Peas                                       | 17   |
| Water, tap                                 | 221  |
| Total                                      | 417  |
| <b>Pizza crust<sup>1</sup></b>             |      |
| <b>MPI</b>                                 |      |
| Milk protein isolate                       | 25   |
| Bisquick, Heart Smart                      | 17   |
| Egg Yolk                                   | 3    |
| spices                                     | 0.1  |
| Water                                      | 21   |
| Total                                      | 67   |
| <b>CON</b>                                 |      |
| Thick It                                   | 11   |
| Polycose                                   | 14   |
| Bisquick, Heart Smart                      | 17   |
| Egg Yolk                                   | 3    |
| spices                                     | 0.1  |
| Water                                      | 22   |
| Total                                      | 67   |
| <b>Fruit smoothie<sup>2</sup></b>          |      |
| <b>MPI</b>                                 |      |

|                                                       |     |
|-------------------------------------------------------|-----|
| Milk protein isolate                                  | 12  |
| Jamb Razzmataz Smoothie Mix                           | 106 |
| Trop 50 Pomegranite Blueberry Juice                   | 108 |
| Splenda                                               | 1   |
| Strawberries, frozen unsweetened                      | 23  |
| Total                                                 | 250 |
| <b>CON</b>                                            |     |
| Polycose                                              | 12  |
| Jamb Razzmataz Smoothie Mixz                          | 106 |
| Trop 50 Pomegranite Blueberry Juice                   | 108 |
| Splenda                                               | 1   |
| Strawberries, frozen unsweetened                      | 23  |
| Total                                                 |     |
| <b>Ham and cheese hashbrown casserole<sup>1</sup></b> |     |
| <b>MPI</b>                                            |     |
| Milk protein isolate                                  | 3   |
| Cream of Celery Soup                                  | 68  |
| Hashbrowns                                            | 178 |
| Cream Cheese, light                                   | 25  |
| Kentucky legend                                       | 17  |
| Cheddar cheese                                        | 17  |
| Water                                                 | 78  |
| Total                                                 | 419 |
| <b>CON</b>                                            |     |
| Thick It                                              | 16  |
| Polycose                                              | 18  |
| Cream of Celery Soup                                  | 68  |
| Hashbrowns                                            | 178 |
| Cream Cheese, light                                   | 25  |
| Kentucky legend                                       | 13  |
| Cheddar cheese                                        | 20  |
| Water                                                 | 78  |
| Total                                                 | 417 |

<sup>1</sup>These foods were manipulated based on the participants body weight

<sup>2</sup>These foods were kept constant regardless of participants body weight

Abbreviations: CON, control intervention group consuming a Western-style eating pattern including 0.7 g carbohydrate/kg/d from maltodextrin; MPI, intervention group consuming a Western-style eating pattern including 0.7 g protein/kg/d from milk protein isolate

**Supplemental Table 4.** Average daily nutrient intake over 7 days for an 88 kg female during the 3-week weight maintenance baseline period and the 16-week weight loss intervention period\*

|                                   | Baseline         | Intervention     |                  |
|-----------------------------------|------------------|------------------|------------------|
|                                   |                  | CON              | MPI              |
| Energy (kcal)                     | 2358 ± 7         | 1612 ± 13        | 1614 ± 13        |
| Total fat (g) (% energy)          | 81 ± 3 (31 ± 1)  | 50 ± 1 (28 ± 0)  | 50 ± 1 (28 ± 1)  |
| Saturated fat (g) (% energy)      | 34 ± 3 (13 ± 1)  | 14 ± 3 (8 ± 2)   | 14 ± 3 (8 ± 2)   |
| Monounsaturated fat (g)           | 16 ± 2           | 9 ± 2            | 9 ± 3            |
| Polyunsaturated fat (g)           | 10 ± 3           | 3 ± 2            | 3 ± 2            |
| Total carbohydrate (g) (% energy) | 344 ± 6 (58 ± 1) | 225 ± 5 (56 ± 1) | 167 ± 4 (41 ± 1) |
| Total sugars (g)                  | 197 ± 15         | 29 ± 12          | 27 ± 14          |
| Total fiber (g)                   | 21 ± 3           | 13 ± 3           | 15 ± 3           |
| Protein (g) (% energy)            | 70 ± 0 (12 ± 0)  | 70 ± 1 (17 ± 0)  | 131 ± 1 (33 ± 0) |
| Protein (g/kg)                    | 0.8 ± 0.0        | 0.80 ± 0.01      | 1.49 ± 0.01      |
| Total cholesterol (mg)            | 167 ± 45         | 124 ± 3          | 126 ± 35         |
| Sodium (mg)                       | 4134 ± 632       | 1854 ± 486       | 2043 ± 436       |
| Calcium (mg)                      | 661 ± 116        | 749 ± 157        | 1173 ± 423       |
| Vitamin D (µg)                    | 77 ± 48          | 62 ± 56          | 60 ± 53          |

\*Values are mean ± SD. A 1600 kcal/d intervention diet represents the mode among participants.
